# Supplementary material for: Male Linked Genomic Region Determines Sex in Dioecious Amaranthus palmeri
Source: PubMed Central journal article supplement — J Hered. 2020 Dec 19;111(7):606–12. doi: 10.1093/jhered/esaa047 (PMC7846199; doi:10.1093/jhered/esaa047), 2020-12-19
Supplement: esaa047_suppl_supplementary_material.pdf [file esaa047_suppl_supplementary_material.pdf]

## Supplement

|                                         | AMA1          | AMA2          | AMA5        | AMA6          |
|-----------------------------------------|---------------|---------------|-------------|---------------|
| Population                              | California    | California    | Kansas      | Kansas        |
| Sex                                     | male          | female        | male        | female        |
| Individuals                             | 35            | 32            | 25          | 35            |
| Raw read pairs <sup>1</sup>             | 467,707,106   | 426,450,124   | 322,106,487 | 371,673,480   |
| Per pool coverage (X)                   | 331.71        | 302.45        | 228.44      | 263.60        |
| Per individual coverage (mean X)        | 9.48          | 9.45          | 9.14        | 7.53          |
| Mapped to <i>A. hypochondriacus</i> (%) | 90.54%        | 92.55%        | 92.12%      | 92.06%        |
| Filtered paired reads <sup>2</sup>      | 460,522,536   | 420,526,544   | 316,496,725 | 365,964,343   |
| Total k-mers <sup>3</sup>               | 1,329,452,869 | 1,235,093,537 | 961,598,655 | 1,066,417,174 |
| k-mers/read pair (mean)                 | 2.89          | 2.94          | 3.04        | 2.91          |
| Sum male specific k-mers <sup>4</sup>   | 17,259,830    | 0             | 13,168,285  | 52,698        |
| Sum female specific k-mers <sup>4</sup> | 83,397        | 324,143       | 12,994      | 249,012       |

**Table S1 Data Summary** <sup>1</sup> Paired end 2x 150bp reads. <sup>2</sup> Trimmed and quality filtered correctly paired reads. <sup>3</sup> 35-mers from filtered reads with  $15 \leq \text{count} \leq 2000$ . <sup>4</sup> unique k-mers *times* number of each k-mer after correction with Kansas population. Values > 0 in opposite pools result from filter steps. For instance, more than 2,000 or below 20 k-mers in opposite pool

| Scaffold | Scaffold size | Covered BPs | Covered (%) | Male specific BPs | Male specific (%) |
|----------|---------------|-------------|-------------|-------------------|-------------------|
| 20       | 1968246       | 428904      | 21.79       | 51615877          | 91.42             |
| 6        | 20110894      | 5314        | 0.03        | 888631            | 1.57              |
| 10       | 16397930      | 6057        | 0.04        | 641181            | 1.14              |
| 5        | 21298423      | 5123        | 0.02        | 577873            | 1.02              |
| 3        | 23382003      | 4432        | 0.02        | 343804            | 0.61              |
| 81       | 33215765      | 3631        | 0.01        | 306992            | 0.54              |
| 259      | 43907         | 2592        | 5.9         | 227170            | 0.4               |
| 9        | 16692146      | 2478        | 0.01        | 216295            | 0.38              |
| 2        | 25377341      | 1841        | 0.01        | 156778            | 0.28              |
| 22       | 1315334       | 1354        | 0.1         | 155948            | 0.28              |
| 4        | 21854484      | 1828        | 0.01        | 153487            | 0.27              |
| 1        | 31626665      | 2043        | 0.01        | 146878            | 0.26              |
| 11       | 16251303      | 2007        | 0.01        | 128730            | 0.23              |
| 12       | 14118028      | 1669        | 0.01        | 124206            | 0.22              |
| 80       | 34472010      | 1472        | 0           | 112312            | 0.2               |
| 8        | 18030403      | 1629        | 0.01        | 104343            | 0.18              |
| 16       | 8418444       | 1356        | 0.02        | 95906             | 0.17              |
| 7        | 19699934      | 1332        | 0.01        | 93398             | 0.17              |
| 73       | 47327         | 472         | 1           | 45973             | 0.08              |
| 19       | 2235478       | 612         | 0.03        | 42613             | 0.08              |
| 18       | 2575540       | 533         | 0.02        | 41511             | 0.07              |
| 92       | 286925        | 162         | 0.06        | 36415             | 0.06              |
| 17       | 6914372       | 521         | 0.01        | 35750             | 0.06              |
| 78       | 16516         | 320         | 1.94        | 32983             | 0.06              |
| 14       | 11695121      | 533         | 0           | 31634             | 0.06              |
| 84       | 2698915       | 269         | 0.01        | 18466             | 0.03              |
| 183      | 51914         | 239         | 0.46        | 14837             | 0.03              |
| 247      | 304540        | 234         | 0.08        | 14812             | 0.03              |
| 86       | 829192        | 115         | 0.01        | 7284              | 0.01              |
| 248      | 225155        | 125         | 0.06        | 6945              | 0.01              |
| 15       | 8446923       | 102         | 0           | 6220              | 0.01              |
| 27       | 286531        | 110         | 0.04        | 5959              | 0.01              |
| 25       | 438162        | 97          | 0.02        | 5419              | 0.01              |
| 121      | 98696         | 86          | 0.09        | 4535              | 0.01              |
| 90       | 308815        | 84          | 0.03        | 4200              | 0.01              |
| 113      | 124836        | 65          | 0.05        | 3586              | 0.01              |
| 31       | 199361        | 45          | 0.02        | 2385              | 0                 |
| 213      | 33128         | 40          | 0.12        | 2107              | 0                 |
| 226      | 27712         | 35          | 0.13        | 1854              | 0                 |
| 56       | 82381         | 22          | 0.03        | 1109              | 0                 |
| 130      | 86235         | 10          | 0.01        | 500               | 0                 |
| 237      | 17867         | 4           | 0.02        | 200               | 0                 |

**Table S2** Mapping of extracted male specific reads to *A. palmeri* draft genome v1.1. Covered describes the size of the scaffold covered by male specific reads. "Male specific" indicates the amount and proportion of male all specific reads that mapped to a specific scaffold

| Scaffold | Scaffold size | Covered BPs | Covered (%) | Female specific BPs | Female specific (%) |
|----------|---------------|-------------|-------------|---------------------|---------------------|
| 20       | 1968246       | 308         | 0.02        | 18829               | 63.86               |
| 4        | 21854484      | 125         | 0           | 7138                | 24.21               |
| 3        | 23382003      | 55          | 0           | 2854                | 9.68                |
| 1        | 31626665      | 8           | 0           | 408                 | 1.38                |
| 6        | 20110894      | 5           | 0           | 255                 | 0.86                |

**Table S3** Mapping of extracted female specific reads to *A. palmeri* draft genome v1.1. Covered describes the size of the scaffold covered by female specific reads. "Female specific" indicates the amount and proportion of female all specific reads that mapped to a specific scaffold

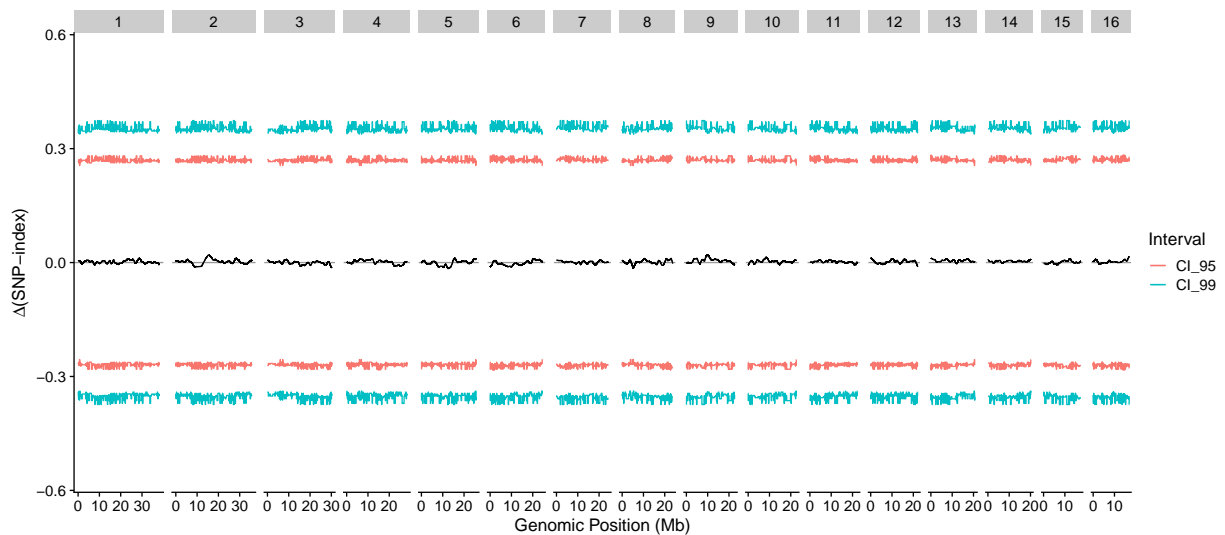

**Figure S1** Differences in allele frequencies between male and female pools of the Kansas population along the genome, relative to the *A. hypochondiracus* reference. Red and blue lines represent 95% and 99% confidence intervals for frequency outliers.

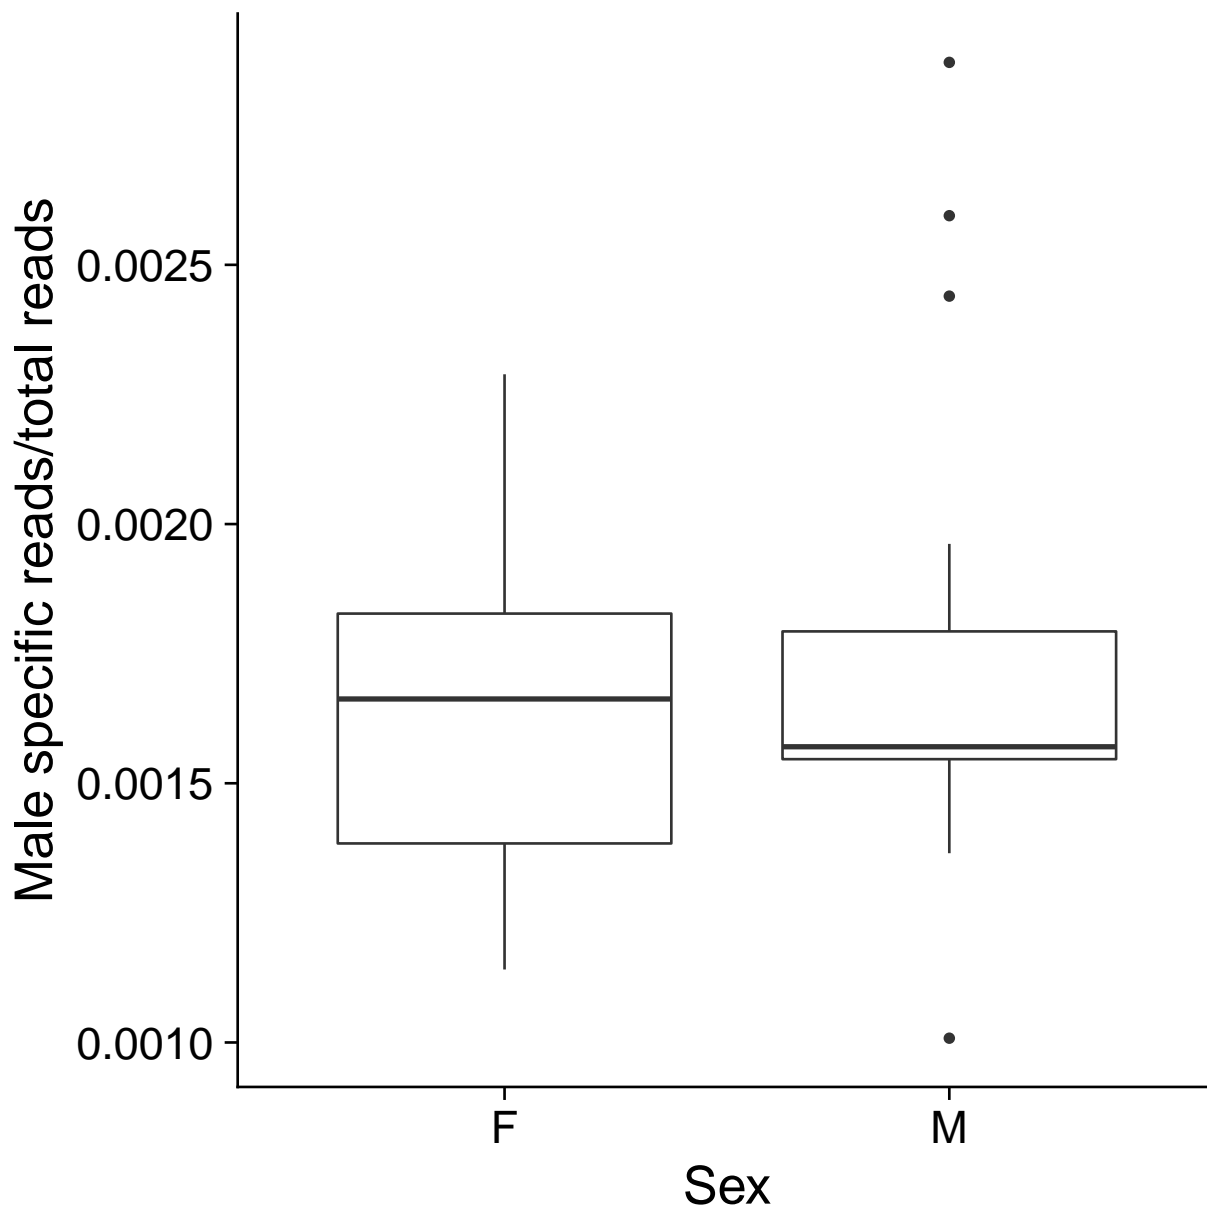

**Figure S2 *A. tuberculatus* reads extracted** Ratio of *A. palmeri* male specific k-mer containing reads in *A. tuberculatus* samples. No significant difference between female (n=19) and male (n=25)

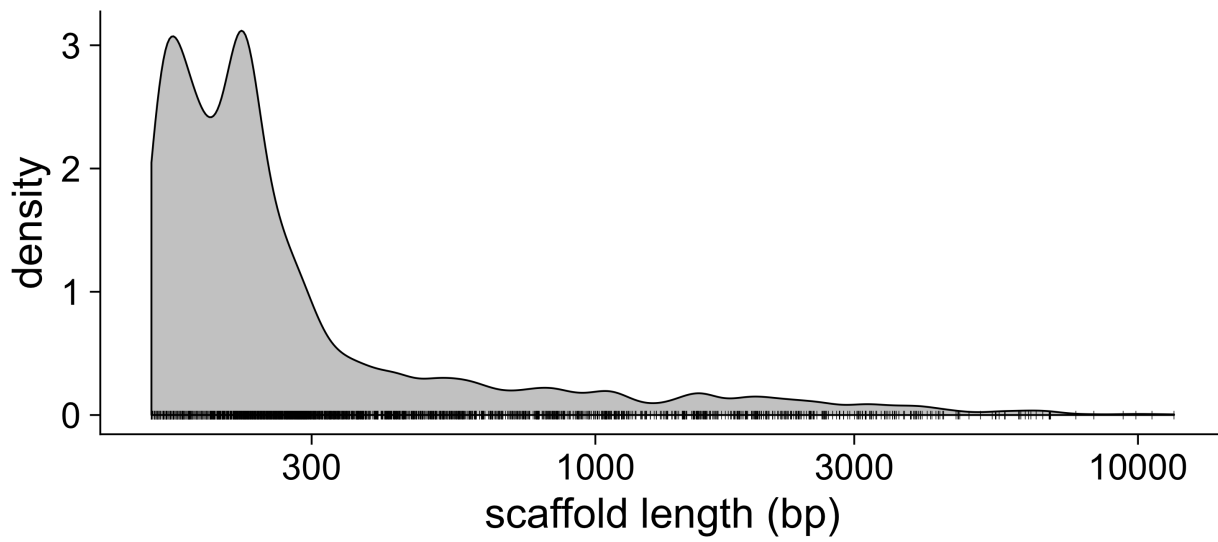

**Figure S3 Scaffold size distribution** Size distribution of scaffolds assembled from sex specific reads. Ticks on the x-axis show value distribution
